# Supplementary material
Source: PubMed Central journal article supplement (PMC1809981)
Supplement: 15101402supp.pdf [file 15101402supp.pdf]

These are electronic appendices to the Biology Letter by Kumar *et al.* 2004 Ancient wolf lineages in India. *Proc. R. Soc. Lond. B (Suppl.)* **271**, S1–S4. (DOI 10.1098/rsbl.2003.0071.)

Electronic appendices are refereed with the text. However, no attempt has been made to impose a uniform editorial style on the electronic appendices.

## **Electronic Appendix A**

### DNA Methods:

Modern DNA was extracted from hair, blood, and tissue samples using a QIAGEN DNeasy™ DNA extraction kit following manufacturer's protocol (Qiagen, Valencia, CA). Ancient DNA was extracted from samples taken from museum specimens that included 22 bone samples and one skin sample. These were obtained from the Natural History Museum, South Kensington, UK (BM; n=14), the National Museum of Natural History, Washington, DC, USA (NMNH; n= 8), and the Field Museum of Natural History, Chicago, IL, USA (FMNH; n =1). Specimens had been collected in current-day Nepal, Tibet, India and Pakistan. In some cases, exact locality data were not available; these are noted in online appendix B. DNA extractions were performed as in Fleischer *et al.* (2000) and all but two specimens yielded sequence. BM samples were analyzed in an ancient DNA lab at the University of Durham in the UK, while FMNH and USNM samples were analyzed at the Smithsonian Genetics Program ancient DNA laboratory in the U.S.

We amplified two regions of mitochondrial DNA from modern samples: an approximately 440 base pair (bp) fragment of the control region I (CR) using universal primers ThrL 15926 and DL-H 16340 as in Vilà *et al.* (1999); and a 412 bp fragment of the cytochrome *b* gene using a canid specific light primer (Canid L1, Paxinos *et al.* 1997) and a universal heavy primer (H15915, Kocher *et al.* 1989).

Each PCR reaction was carried out in a 25µl volume including 0.5 units of AmpliTaq Gold (Perkin-Elmer), 2.5 mM MgCl<sub>2</sub>, 1X reaction buffer (Perkin-Elmer) 200µM each dNTP, and 1µM each primer. Mineral oil was added. Reactions were run for 5 minutes at 94°C and subsequently for 35 cycles of 1 minute denaturing at 92°C, 1.5 minute annealing at 48-50°C and 1.5 minutes extension at 72°C and a final extension cycle at 72°C for 7 minutes in a 480 PE thermocycler (Perkin-Elmer). All DNA extractions and PCR amplification from modern Indian wolves were performed at the Conservation Genetics Laboratory at the WII. Gel purified PCR products were directly sequenced with the Big Dye terminator chemistry and resolved on an ABI 377 automated sequencer (Perkin-Elmer) at the Smithsonian Institution Genetics Program.

For "ancient" samples we designed internal primer sequences to amplify shorter fragments of the CR: IWDL220R (5'-GTTTCTCGAGGCATGGTGAT-3'); IWDL220F (5'-TGAATCACCCCTACTGTGCTAT-3'); IWDL150F (5'-GGTTTGCCCCATGCATATAA-3') and IWDL206R (5'-AAGCCCTTATTGGACTAGGTGA-3'). PCR amplifications used AmpliTaq gold (Perkin-Elmer) and reaction conditions as in Fleischer et al. (2000). PCR products were directly sequenced as described above. Sequence data were aligned using the program SEQUENCHER 4.12 (Gene Codes Corp.).

#### Nuclear Transpositions:

We do not feel that the three different clades of wolves found in our study were an artifact of nuclear transpositions of mitochondrial DNA for the following reasons:

1. We cloned PCR products from three individuals used in this study – one

Himalayan wolf (D192 from Himachal Pradesh), one Indian wolf (D107 from Bhal) and one Indian dog (D9P, Bhutia dog from Himachal Pradesh). We sequenced from five clones per individual. In all cases, the clone sequences matched those expected based on the earlier direct sequence, with the exception of a small number of single base changes (0.43 mutations per sequence on average) expected from such cloning experiments. In no case did a sequence arise that matched one from a different clade.

2. It is not likely that two separate amplifications of different gene regions (Cytb and CR) would both result in nuclear copies. Both pieces show the same pattern and relative levels of divergence.
3. It is unlikely that all of the smaller, often overlapping pieces of sequence amplified from museum specimens with different primers would be nuclear copies. We did not detect sequences from one clade that matched those of another among these pieces, something that would suggest nuclear copies.
4. We did not see any consistent double sequence.
5. In the Cytb sequences, we did not find stop codons, insertions or deletions, or other unusual patterns often suggestive of nuclear copies.

#### Wolf and Dog Hybridization:

Although there is some indication that Indian *C. l. pallipes* can breed with dogs in captivity, we found no evidence of natural hybridization (i.e., wolf haplotypes in Indian dogs, or vice-versa) unlike that occasionally observed in Europe (Randi & Lucchini 2002). However, our sample sizes are relatively small for this type of analysis, and a

frequency of 6.4% of dog haplotypes would have to be present in the wolf population in order to be detected in our sample of 45 wolves (95% CI from a binomial sampling distribution). In addition, all of our wolf sequences that fall within the dog-wolf clade have haplotypes identical or very closely related to previously published wolf sequences from China and Saudi Arabia, are nested within a clade only containing wolf haplotypes (Fig 1b), and do not fall in any of the major dog clades (A, B, C, D and E) (Tsuda et al, Vila et al Savolainen et al). All of our Indian dog sequences, however, fall in several of the four major dog clades reported in Savolainen et al (2002), but not in the wolf clade.

#### Literature Cited:

- Fleischer, R. C., Olson, S., James, H. F. & Cooper, A. C. 2000. The identity of the extinct Hawaiian eagle (*Haliaeetus*) as determined by mitochondrial DNA sequence. *Auk* 117, 1051-1056.
- Kocher, T.D., Thomas W.K., Meyer A. *et al.* 1989. Dynamics of mitochondrial DNA evolution in animals: amplification and sequencing with conserved primers *Proc. Natl. Acad. Sci. USA* 86, 6196-6200.
- Paxinos E., McIntosh C., Ralls K. & Fleischer R. 1997. A noninvasive method for distinguishing among canid species: amplification and enzyme restriction of DNA from dung. *Mol. Ecol.* 6, 483-486.
- Randi, E. & Lucchini, V. 2002. Detecting rare introgression of domestic dog genes into wild wolf (*Canis lupus*) populations by Bayesian admixture analyses of microsatellite variation *Cons. Gen.* 3, 29 (2002).

## Electronic Appendix B

| Specimen                                         |                             |     |           | Genbank                                                             |                 |           |                  |
|--------------------------------------------------|-----------------------------|-----|-----------|---------------------------------------------------------------------|-----------------|-----------|------------------|
| ID                                               | Species                     | Sex | Sample    | Locality                                                            | Haplotype acc.# | Date      | Collector        |
| <b>Samples of wolves obtained from the field</b> |                             |     |           |                                                                     |                 |           |                  |
| D1                                               | <i>Canis lupus pallipes</i> | m   | ear pinna | Velavadar National Park, Gujarat                                    | IW-A AY333743   | 18-Jan-95 | Y. V. Jhala      |
| D103                                             | <i>Canis lupus pallipes</i> | f   | blood     | Bhal, Gujarat outskirts of Velavadar National park                  | IW-A AY333743   | 25-Nov-96 | Y. V. Jhala      |
| D105                                             | <i>Canis lupus pallipes</i> | unk | skin+hair | Nanaj-Maharashtra, Great Indian Bustard sanctuary                   | IW-C AY333745   | 17-Jun-99 | Satish K. Sharma |
| D110                                             | <i>Canis lupus pallipes</i> | m   | skin+hair | Eastern Uttar Pradesh, Jaunpur district.                            | IW-B AY333744   | 15-Oct-96 | Y. V. Jhala      |
| D111                                             | <i>Canis lupus pallipes</i> | f   | tissue    | Kachchh district of Gujarat, in Abdasa Taluka                       | IW-B AY333744   | 02-Jan-97 | Y. V. Jhala      |
| D113                                             | <i>Canis lupus pallipes</i> | m   | tissue    | Eastern Uttar Pradesh, Jaunpur district.                            | IW-B AY333744   | 11-Nov-96 | D. K. Sharma     |
| D114                                             | <i>Canis lupus pallipes</i> | m   | tissue    | Eastern Uttar Pradesh, Pratapgadh District                          | IW-B AY333744   | 09-Jan-96 | Y. V. Jhala      |
| D115                                             | <i>Canis lupus pallipes</i> | f   | blood     | Bhal, Gujarat outskirts of Velavadar National park                  | IW-A AY333743   | 23-Feb-96 | Y. V. Jhala      |
| D118                                             | <i>Canis lupus pallipes</i> | m   | tissue    | Bhal, Gujarat outskirts of Velavadar National park                  | IW-B AY333744   | 21-Feb-96 | Y. V. Jhala      |
| D119                                             | <i>Canis lupus pallipes</i> | m   | tissue    | Eastern Uttar Pradesh, Pratapgadh District                          | IW-A AY333743   | 01-Nov-96 | D. K. Sharma     |
| D121                                             | <i>Canis lupus pallipes</i> | f   | blood     | Kachchh district of Gujarat, Daun Grasslands                        | IW-A AY333743   | 18-Feb-97 | Y. V. Jhala      |
| D151                                             | <i>Canis lupus pallipes</i> | m   | Blood     | Kachchh district of Gujarat, in Abdasa Taluka                       | IW-A AY333743   | 20-Jun-99 | Y. V. Jhala      |
| D163                                             | <i>Canis lupus pallipes</i> | f   | Blood     | Bhal, Gujarat outskirts of Velavadar National park                  | IW-A AY333743   | 27-Dec-00 | Y. V. Jhala      |
| D166                                             | <i>Canis lupus pallipes</i> | f   | ear pinna | Kachchh district of Gujarat, Daun Grasslands                        | IW-B AY333744   | 04-Dec-00 | Y. V. Jhala      |
| D19                                              | <i>Canis lupus pallipes</i> | f   | muscle    | Kachchh district of Gujarat, Daun Grasslands                        | IW-A AY333743   | 02-Jul-00 | Y. V. Jhala      |
| D2                                               | <i>Canis lupus pallipes</i> | m   | blood     | Hindustan Aeronautics Ltd Air Base, Nasik, Maharashtra              | IW-A AY333743   | 17-Apr-99 | Y. V. Jhala      |
| D25                                              | <i>Canis lupus pallipes</i> | m   | blood     | Hindustan Aeronautics Ltd Air Base, Nasik, Maharashtra              | IW-A AY333743   | 13-Jun-00 | Y. V. Jhala      |
| D32                                              | <i>Canis lupus pallipes</i> | unk | blood     | Bhal, Gujarat outskirts of Velavadar National park                  | IW-A AY333743   | 19-Jun-99 | Y. V. Jhala      |
| D4                                               | <i>Canis lupus pallipes</i> | f   | blood     | Hindustan Aeronautics Ltd Air Base, Nasik, Maharashtra              | IW-A AY333743   | 17-Apr-99 | Y. V. Jhala      |
| D48                                              | <i>Canis lupus chanco</i>   | m   | tissue    | Laddakh, Jammu and Kashmir, India                                   | W15 AF008142    | 20-Jun-99 | R. S. Chundawat  |
| D5                                               | <i>Canis lupus pallipes</i> | f   | blood     | Kachchh district of Gujarat, Daun Grasslands                        | IW-A AY333743   | 01-Aug-99 | Y. V. Jhala      |
| D50                                              | <i>Canis lupus pallipes</i> | m   | blood     | Bhal, Gujarat outskirts of Velavadar National park                  | IW-A AY333743   | 02-Jul-95 | Y. V. Jhala      |
| D54                                              | <i>Canis lupus pallipes</i> | m   | blood     | Kachchh district of Gujarat, Abdasa Taluka, in Pat River catchment. | IW-B AY333744   | 02-Aug-98 | Y. V. Jhala      |
| D57                                              | <i>Canis lupus pallipes</i> | m   | blood     | Velavadar National Park, Gujarat                                    | IW-A AY333743   | 29-Dec-97 | Y. V. Jhala      |
| D59                                              | <i>Canis lupus pallipes</i> | m   | Blood     | Velavadar National Park, Gujarat                                    | IW-A AY333743   | 31-Jan-95 | Y. V. Jhala      |
| D63                                              | <i>Canis lupus pallipes</i> | f   | blood     | Kachchh district of Gujarat, Daun Grasslands                        | IW-B AY333744   | 01-Aug-99 | Y. V. Jhala      |
| D69                                              | <i>Canis lupus pallipes</i> | m   | tissue    | Eastern Uttar Pradesh, Pratapgadh District                          | IW-B AY333744   | 15-Oct-96 | Y. V. Jhala      |
| D73                                              | <i>Canis lupus pallipes</i> | f   | tissue    | Kachchh district of Gujarat, in Abdasa Taluka                       | IW-A AY333743   | 11-Apr-97 | Y. V. Jhala      |
| D75                                              | <i>Canis lupus pallipes</i> | f   | tissue    | Kachchh district of Gujarat, in Abdasa Taluka                       | IW-A AY333743   | 04-Aug-97 | Y. V. Jhala      |

|     |                             |   |            |                                                        |      |          |           |             |
|-----|-----------------------------|---|------------|--------------------------------------------------------|------|----------|-----------|-------------|
| D76 | <i>Canis lupus pallipes</i> | m | gum-tissue | Kachchh district of Gujarat, in Abdasa Taluka          | IW-B | AY333744 | 01-Aug-99 | Y. V. Jhala |
| D79 | <i>Canis lupus pallipes</i> | m | blood      | Hindustan Aeronautics Ltd Air Base, Nasik, Maharashtra | IW-A | AY333743 | 17-Apr-99 | Y. V. Jhala |
| D81 | <i>Canis lupus pallipes</i> | m | tissue     | Kachchh district of Gujarat, in Abdasa Taluka          | IW-A | AY333743 | 28-Jan-99 | Y. V. Jhala |
| D82 | <i>Canis lupus pallipes</i> | f | Ear pinna  | Kachchh district of Gujarat, Daun Grasslands           | IW-A | AY333743 | 01-Aug-99 | Y. V. Jhala |
| D87 | <i>Canis lupus pallipes</i> | f | blood      | Kachchh district of Gujarat, in Abdasa Taluka          | IW-A | AY333743 | 05-Oct-98 | Y. V. Jhala |
| D89 | <i>Canis lupus pallipes</i> | f | Ear pinna  | Bhal, Gujarat outskirts of Velavadar National park     | IW-A | AY333743 | 23-Feb-96 | Y. V. Jhala |
| D94 | <i>Canis lupus pallipes</i> | m | tissue     | Kachchh district of Gujarat, in Abdasa Taluka          | IW-A | AY333743 | 02-Sep-97 | Y. V. Jhala |
| D97 | <i>Canis lupus pallipes</i> | m | ear pinna  | Bhal, Gujarat outskirts of Velavadar National park     | IW-A | AY333743 | 02-Jul-95 | Y. V. Jhala |
| D98 | <i>Canis lupus pallipes</i> | m | blood      | Bhal, Gujarat outskirts of Velavadar National park     | IW-A | AY333743 | 02-Jun-96 | Y. V. Jhala |
| D99 | <i>Canis lupus pallipes</i> | m | ear pinna  | Bhal, Gujarat outskirts of Velavadar National park     | IW-A | AY333743 | 02-Jun-96 | Y. V. Jhala |

### Himalayan wolf samples from Darjeeling Zoo

|       |                           |   |      |                                                                        |      |          |           |                 |
|-------|---------------------------|---|------|------------------------------------------------------------------------|------|----------|-----------|-----------------|
| DTW2  | <i>Canis lupus chanco</i> | f | Hair | Darjeeling Zoo; wolves came to zoo from Spiti Valley, Himachal Pradesh | HW-C | AY333740 | 09-Mar-02 | Dinesh K Sharma |
| DTW6  | <i>Canis lupus chanco</i> | m | Hair | Darjeeling Zoo; wolves came to zoo from Spiti Valley, Himachal Pradesh | HW-C | AY333740 | 09-Mar-02 | Dinesh K Sharma |
| DTW7  | <i>Canis lupus chanco</i> | m | Hair | Darjeeling Zoo; wolves came to zoo from Spiti Valley, Himachal Pradesh | HW-C | AY333740 | 09-Mar-02 | Dinesh K Sharma |
| DTW8  | <i>Canis lupus chanco</i> | f | Hair | Darjeeling Zoo; wolves came to zoo from Spiti Valley, Himachal Pradesh | HW-C | AY333740 | 09-Mar-02 | Dinesh K Sharma |
| DTW9  | <i>Canis lupus chanco</i> | m | Hair | Darjeeling Zoo; wolves came to zoo from Spiti Valley, Himachal Pradesh | HW-C | AY333740 | 09-Mar-02 | Dinesh K Sharma |
| DTW13 | <i>Canis lupus chanco</i> | f | Hair | Darjeeling Zoo; wolves came to zoo from Spiti Valley, Himachal Pradesh | HW-C | AY333740 | 09-Mar-02 | Dinesh K Sharma |
| DTW15 | <i>Canis lupus chanco</i> | m | Hair | Darjeeling Zoo; wolves came to zoo from Spiti Valley, Himachal Pradesh | HW-C | AY333740 | 09-Mar-02 | Dinesh K Sharma |
| DTW17 | <i>Canis lupus chanco</i> | m | Hair | Darjeeling Zoo; wolves came to zoo from Spiti Valley, Himachal Pradesh | HW-C | AY333740 | 09-Mar-02 | Dinesh K Sharma |

note: kin relationships among these wolves and the number of founders is uncertain.

### Kufari wolf

|      |                           |   |      |                                                             |      |          |           |                          |
|------|---------------------------|---|------|-------------------------------------------------------------|------|----------|-----------|--------------------------|
| D192 | <i>Canis lupus chanco</i> | f | Hair | Kufari Zoo; animal came from Spiti valley, Himachal Pradesh | HW-C | AY333740 | 12-May-01 | Dinesh K Sharma/YV Jhala |
|------|---------------------------|---|------|-------------------------------------------------------------|------|----------|-----------|--------------------------|

### Wolf samples obtained from Western museum specimens

|              |                               |     |                    |                                                                                           |      |          |           |                                                     |
|--------------|-------------------------------|-----|--------------------|-------------------------------------------------------------------------------------------|------|----------|-----------|-----------------------------------------------------|
| BM35.1.10.1  | <i>Canis lupus "farriger"</i> | m   | turbinals          | Nepal; "no doubt living animal from Tibet or Kashmir for the Maharajah's collection -RIP" | HW-A | AY333738 | 29-Jan-17 | Reed 21.5.12                                        |
| BM58.6.24.61 | <i>Canis lupus</i>            | m   | turbinals          | Nepal                                                                                     | HW-A | AY333738 | ?         | B. Hodgson                                          |
| BM99.12.29.1 | <i>Canis lupus "farriger"</i> | unk | piece broken skull | Tibet                                                                                     | HW-B | AY333739 | ?         | A.H. Savage-Landor, "skin black" small animal       |
| BM59.670a    | <i>Canis lupus (?) chanco</i> | unk | piece broken bulla | Khumbu, E. Nepal                                                                          | HW-C | AY333740 | 08-May-09 | Zoological Society "Daily Mail" Himalaya Expedition |
| FMNH 92835   | <i>Canis lupus chanco</i>     | unk | piece broken skull | Roivaling Valley, Nepal                                                                   | HW-C | AY333740 | 14-May-09 | E. Hillary et al., fall-winter 1960                 |
| USNM 198457  | <i>Canis lupus chanco</i>     | m   | turbinals          | Kashmir, Ladakh                                                                           | HW-D | AY333741 | 08-Jun-13 | W. L. Abbott                                        |
| USNM 198460  | <i>Canis lupus chanco</i>     | unk | bone from skin     | Tibet, Chan Tung                                                                          | HW-E | AY333742 | 1913      | via W. L. Abbott                                    |

|              |                              |     |                    |                                                                                  |        |          |           |                                                        |
|--------------|------------------------------|-----|--------------------|----------------------------------------------------------------------------------|--------|----------|-----------|--------------------------------------------------------|
| BM35.8.30.2  | <i>Canis lupus pallipes</i>  | m?  | bone               | Bikanir, India                                                                   | IW-A   | AY333743 | ?         | "H.H. the heir apparent & pres. of Bikanir"            |
| BM35.1.18.1  | <i>Canis lupus pallipes</i>  | m   | turinals, ligament | Hazaribagh, Dist. Bengal, India                                                  | IW-A   | AY333743 | 13-Dec-02 | Maj. O. A. Smith, BNHS                                 |
| USNM 16147a  | <i>Canis lupus pallipes</i>  | unk | turinals           | Karachi ("Kurrachee"), Pakistan                                                  | IW-A   | AY333743 | year 1875 | Karachi Municipal Library and Museum                   |
| BM56.9.22.24 | <i>Canis lupus pallipes</i>  | unk | piece broken skull | Punjab                                                                           | IW-B   | AY333744 | ?         | "Lieut. Abbott, 57 rgt."                               |
| BM65.1037    | <i>Canis lupus chanco</i>    | m   | turinals           | Punjab, Sidhna, near Ravi River, S. tip of Rechna Doab                           | IW-B   | AY333744 | 26-Nov-64 | T. J. Roberts                                          |
| BM85.8.1.52  | <i>Canis lupus pallipes</i>  | m   | turinals           | Sambhar, Rajputana, India                                                        | IW-C   | AY333745 | ?         | R.M. Adam, prep; A. O. Hume                            |
| BM35.1.10.3  | <i>Canis lupus "laniger"</i> | f   | bone               | Rawal Pindi, Upper Punjab, India                                                 | IW-D   | AY333746 | 14-Nov-16 | Gill. Zool. Soc. rec'd 25 Oct 1912, died 14 Nov 1916.  |
| BM20.1.17.5  | <i>Canis lupus "laniger"</i> | unk | ligament bits      | Gilgit, Kashmir                                                                  | WD-W14 | AF008141 | 14-Jun-02 | Maj. A.D. MacPherson, "BNHS" "supposed cross with dog" |
| BM99.6.23.2  | <i>Canis lupus "laniger"</i> | unk | turinals, mandible | Braldu, Scardo, Baltistan, Kashmir                                               | WD-W15 | AF008142 | ?         | purch'd E. Gerrard                                     |
| USNM 198458  | <i>Canis lupus chanco</i>    | f   | turinals/cartilage | Nubra Valley, Tiggur, Kashmir                                                    | WD-W15 | AF008142 | 08-Aug-13 | W. L. Abbott -8170                                     |
| BM33.7.20.6  | <i>Canis lupus "laniger"</i> | m   | bone               | Gilgit, Kashmir; 36N 74E, 7000'; "caught as a cub & known to be about 6 mo. old" | WD-A   | AY333747 | ?         | "Major W. T. R. Trevelyan"                             |
| USNM 198463  | <i>Canis lupus chanco</i>    | unk | turinals           | Pakistan, Baltistan, Shigar                                                      | WD-W15 | AF008142 | 1913      | W. L. Abbott                                           |
| USNM 198462  | <i>Canis lupus chanco</i>    | unk | bone from skin     | Tibet, but possibly Ladakh                                                       | WD-W14 | AF008141 | 1913      | via W. L. Abbott                                       |

BM=The Natural History Museum, South Kensington, UK; USNM=National Museum of Natural History, Smithsonian Institution, Washington, DC, USA; FMNH=Field Museum of Natural History, Chicago, IL, USA.

## Dog samples obtained from India

|      |     |     |       |                                                                                                               |      |          |  |                  |
|------|-----|-----|-------|---------------------------------------------------------------------------------------------------------------|------|----------|--|------------------|
| D1P  | dog | unk | Hair  | Adjoining areas of Pakhui wildlife sanctuary in Tipi region of Arunachal Pradesh (Twang- local breed of dogs) | ID-H | AY333734 |  | Nita Shah        |
| D2P  | dog | unk | Hair  | Adjoining areas of Pakhui wildlife sanctuary in Tipi region of Arunachal Pradesh (Twang- local breed of dogs) | ID-G | AY333733 |  | Nita Shah        |
| D3P  | dog | f   | Hair  | Adjoining areas of Pakhui wildlife sanctuary in Tipi region of Arunachal Pradesh (Twang- local breed of dogs) | ID-I | AY333735 |  | Nita Shah        |
| D4P  | dog | unk | Blood | Outskirts of Velavadar National Park                                                                          | ID-I | AY333735 |  | Y.V. Jhala       |
| D6P  | dog | f   | Hair  | Adjoining areas of Pakhui wildlife sanctuary in Tipi region of Arunachal Pradesh (Twang- local breed of dogs) | ID-G | AY333733 |  | Nita Shah        |
| D6P  | dog | m   | Hair  | Adjoining areas of Pakhui wildlife sanctuary in Tipi region of Arunachal Pradesh (Twang- local breed of dogs) | ID-G | AY333733 |  | Nita Shah        |
| D7P  | dog | f   | Hair  | Outskirts of Velavadar National Park                                                                          | ID-I | AY333735 |  | Y.V. Jhala       |
| D8P  | dog | m   | Hair  | Bhutia Dog from Palampur Valley, Himachal Pradesh                                                             | ID-J | AY333736 |  | Dinesh k. Sharma |
| D9P  | dog | m   | Hair  | Bhutia dog from Kullu valley, Himachal Pradesh                                                                | ID-H | AY333734 |  | Dinesh k. Sharma |
| D10P | dog | m   | Hair  | Bhutia dog from Kangra Valley, Himachal Pradesh                                                               | ID-H | AY333734 |  | Dinesh k. Sharma |
| D11P | dog | m   | Hair  | Bhutia dog of nomadic Gaddi (shepherders) tribe of Himachal from Chamba                                       | ID-I | AY333735 |  | Dinesh k. Sharma |
| D12P | dog | m   | Hair  | Bhutia dogs from Upper reaches of Chama district Himachal Pradesh                                             | ID-A | AY333727 |  | Dinesh k. Sharma |
| D14P | dog | m   | Hair  | Bhutia dog from Upper reaches of Kullu valley                                                                 | ID-H | AY333734 |  | Dinesh k. Sharma |
| D15P | dog | m   | Blood | Feral dog from Outskirts of Velavadar National Park                                                           | ID-I | AY333735 |  | Dinesh k. Sharma |
| D16P | dog | unk | Hair  | Feral dog from Kachchh, Abdasa Taluka                                                                         | ID-J | AY333736 |  | Y.V. Jhala       |
| D17P | dog | unk | Hair  | Adjoining areas of Pakhui wildlife sanctuary in Tipi region of Arunachal Pradesh (Twang- local breed of dogs) | ID-K | AY333737 |  | Y.V. Jhala       |

|      |                        |     |        |                                                                                                               |      |          |                    |
|------|------------------------|-----|--------|---------------------------------------------------------------------------------------------------------------|------|----------|--------------------|
| D18P | dog                    | f   | Blood  | Feral dog from outskirts of Velavadar National Park                                                           | ID-I | AY333735 | Y.V. Jhala         |
| D19P | dog                    | m   | Hair   | Adjoining areas of Pakhui wildlife sanctuary in Tipi region of Arunachal Pradesh (Twang- local breed of dogs) | ID-E | AY333731 | Nita Shah          |
| D20P | dog                    | m   | Hair   | Adjoining areas of Pakhui wildlife sanctuary in Tipi region of Arunachal Pradesh (Twang- local breed of dogs) | ID-F | AY333732 | Nita Shah          |
| D21P | dog                    | m   | Blood  | Feral Dog from Outskirts of Velavadar National Park                                                           | ID-C | AY333729 | Y.V. Jhala         |
| D22P | dog                    | m   | Hair   | Adjoining areas of Pakhui wildlife sanctuary in Tipi region of Arunachal Pradesh (Twang- local breed of dogs) | ID-B | AY333728 | Nita Shah          |
| D23P | dog                    | m   | Blood  | Velavadar National Park                                                                                       | ID-D | AY333730 | Y.V. Jhala         |
| D24P | dog                    | unk | Tissue | Feral dog from Abdasa district of Kachchh                                                                     | ID-J | AY333736 | Wolf research team |
| W184 | wolf dog hyb (captive) | m   | Blood  | Surendranagar, Gujarat                                                                                        | ID-K | AY333737 |                    |
